# Supplementary material for: Mechanistic insights into defect chemistry and tailored photoluminescence and photocatalytic properties of aliovalent cation substituted Zn0.94M0.06−xLixO (M: Fe3+, Al3+, Cr3+) nanoparticles
Source: Royal Society of Chemistry journal article supplement (doi:10.1039/d1dt01706c), 2021-01-01
Supplement: d1dt01706c1.pdf [file d1dt01706c1.pdf]

## SUPPORTING FIGURES, DATA and TABLES

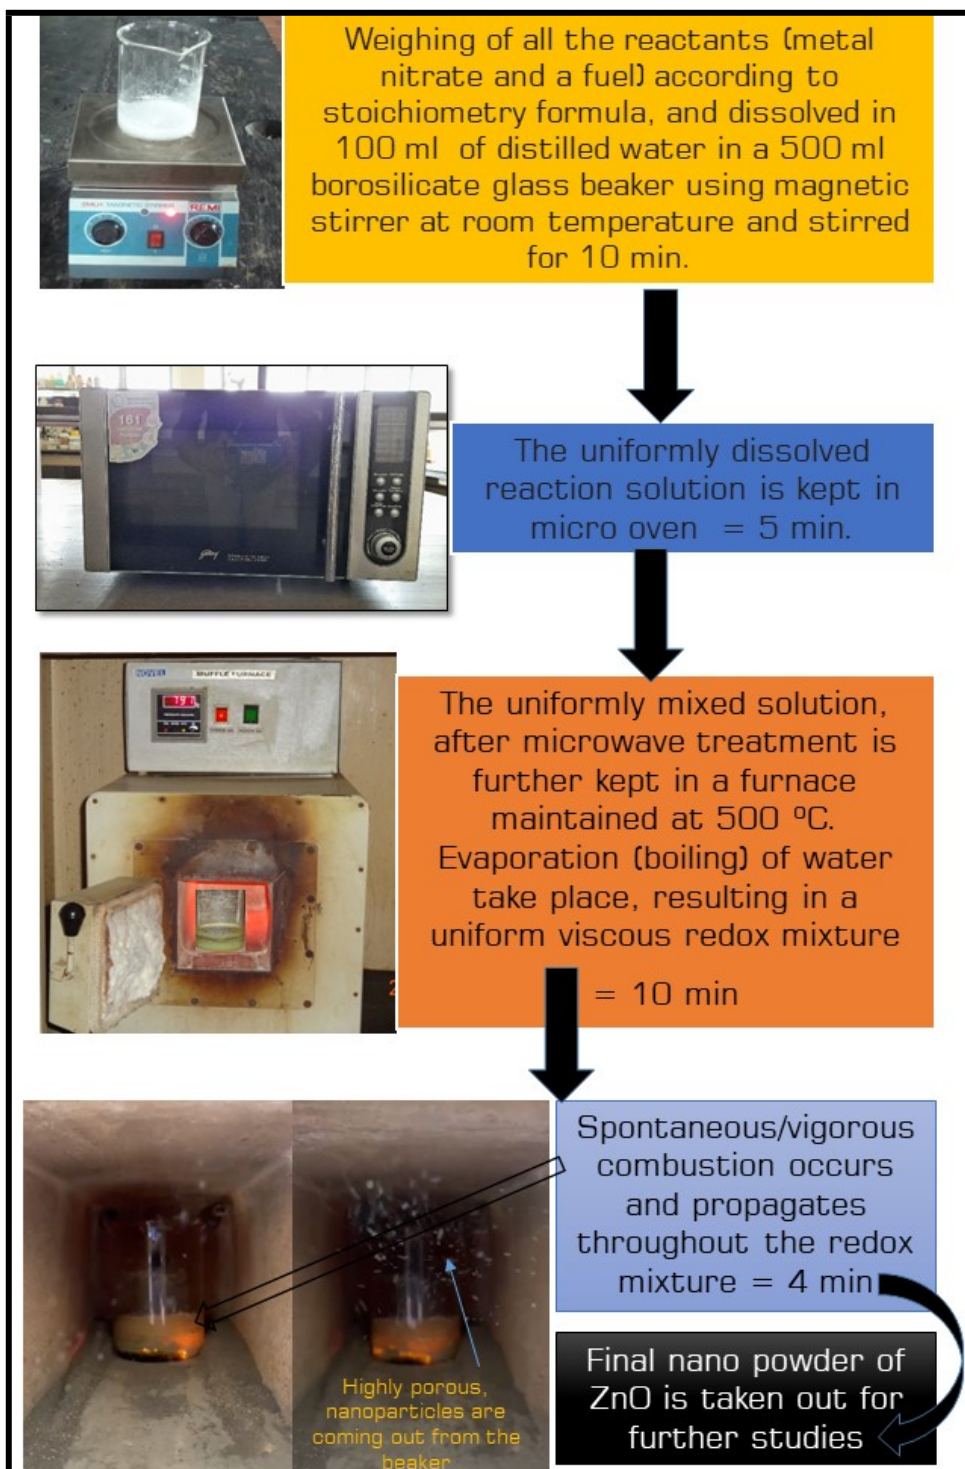

Figure S1: Schematic representation of the preparation of doped ZnO nanoparticles

**Table S2.** Details of important structural features of Rhodamine B dye

---

**Structural details of Rhodamine B (RhB) dye**

---

Chemical Formula  $C_{28}H_{31}ClN_2O_3$

---

Chemical Structure

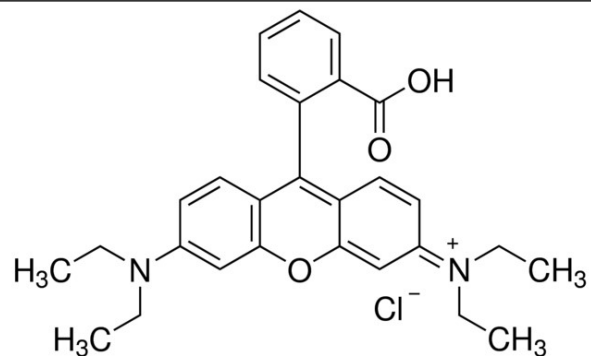

---

Physical appearance-colour Red to violet powder

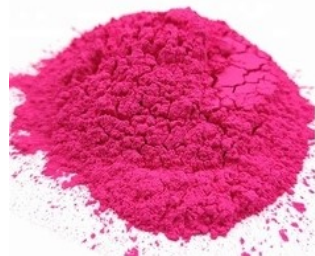

---

IUPAC Name [9-(2-carboxyphenyl)-6-(diethylamino)xanthen-3-ylidene]-diethylazanium;chloride

---

CI name / CI Number 45170

---

Molar mass 479.02 g/mol

---

Solubility ~15 g/L (20 °C)

---

$\lambda_{max}$  554 nm

---

Charge on dye Cationic

---

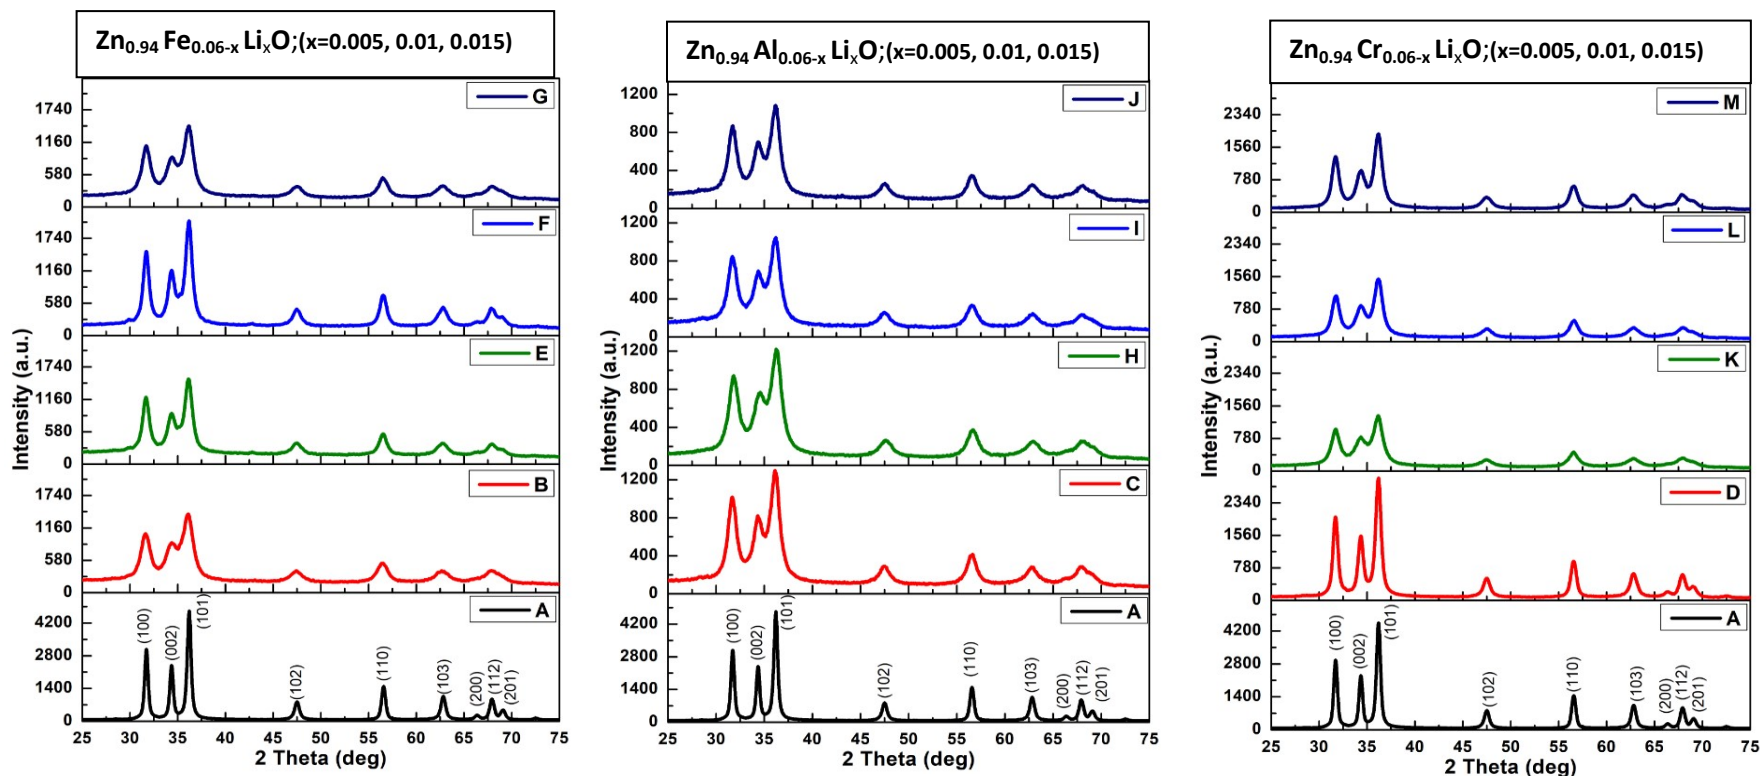

**Figure S3.** XRD patterns of (A) Pure ZnO, (B) 6 mol% Fe<sup>3+</sup> doped ZnO (FZO); (C) 6 mol% Al<sup>3+</sup> doped ZnO (AZO); (D) 6 mol% Cr<sup>3+</sup> doped ZnO (CZO), (E) 0.5 mol% Li<sup>+</sup> ion co-doped FZO, (F) 1 mol% Li<sup>+</sup> ion co-doped FZO, (G) 1.5 mol% Li<sup>+</sup> ion co-doped FZO, (H) 0.5 mol% Li<sup>+</sup> ion co-doped AZO, (I) 1 mol% Li<sup>+</sup> ion co-doped AZO, (J) 1.5 mol% Li<sup>+</sup> ion co-doped AZO, (K) 0.5 mol% Li<sup>+</sup> ion co-doped CZO, (L) 1 mol% Li<sup>+</sup> ion co-doped CZO, and (M) 1.5 mol% Li<sup>+</sup> ion co-doped CZO.

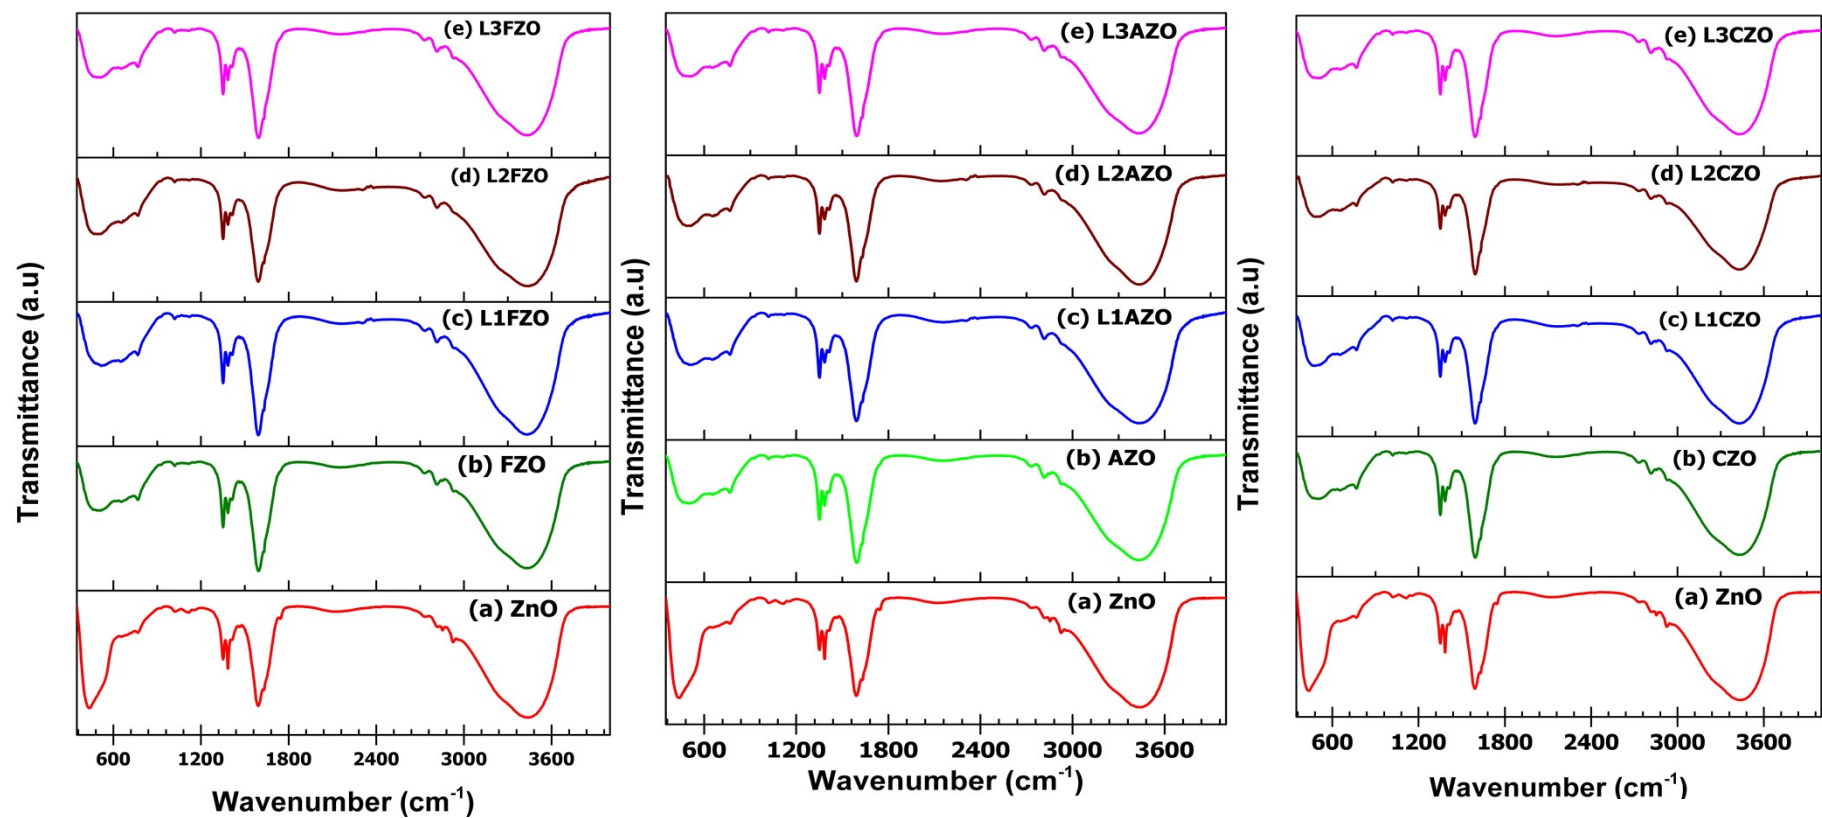

**Figure S4.** FTIR spectra of Li co-doped (a) FZO, (b) CZO (c) AZO photocatalyst with different Li<sup>+</sup> ion concentrations

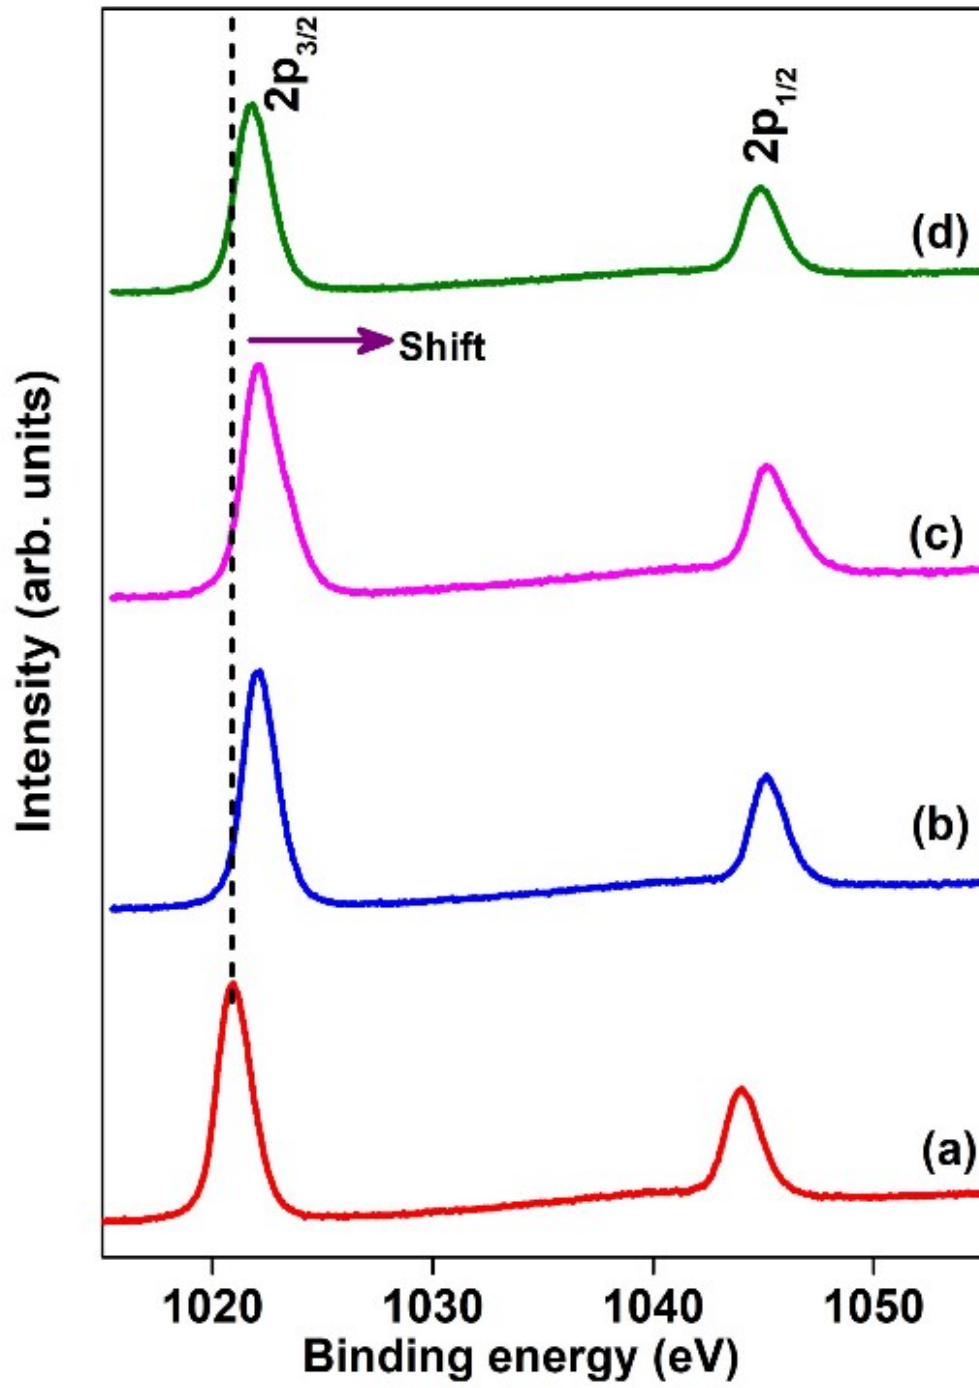

**Figure S5:** Zn 2p spectra of (a) pure ZnO, (b) FZO, (c) AZO and (d) CZO photocatalyst

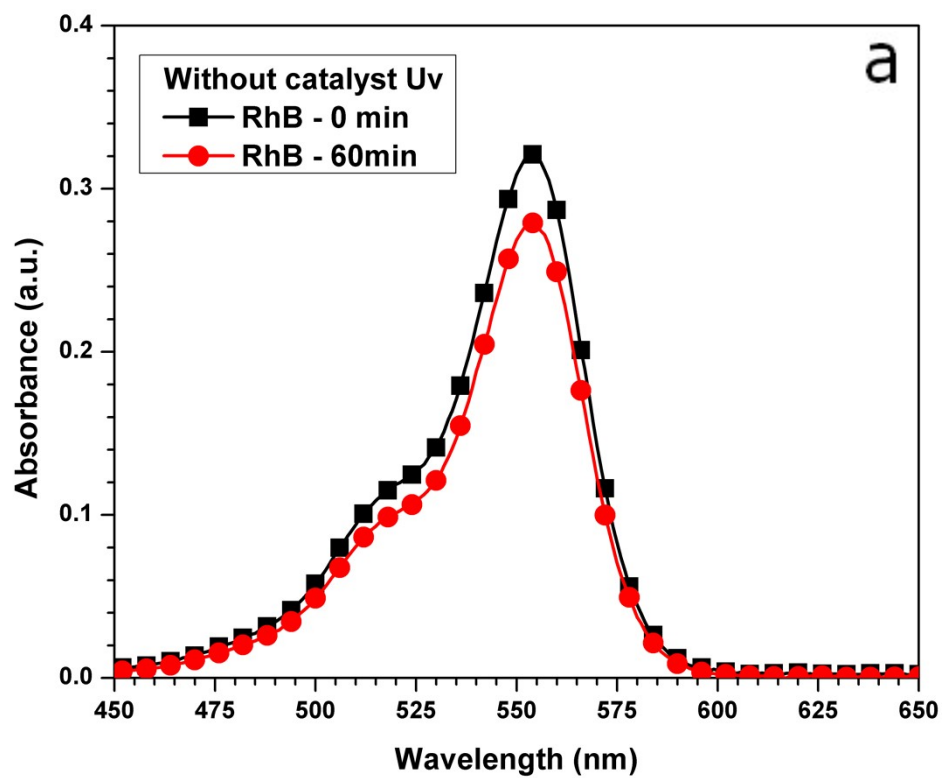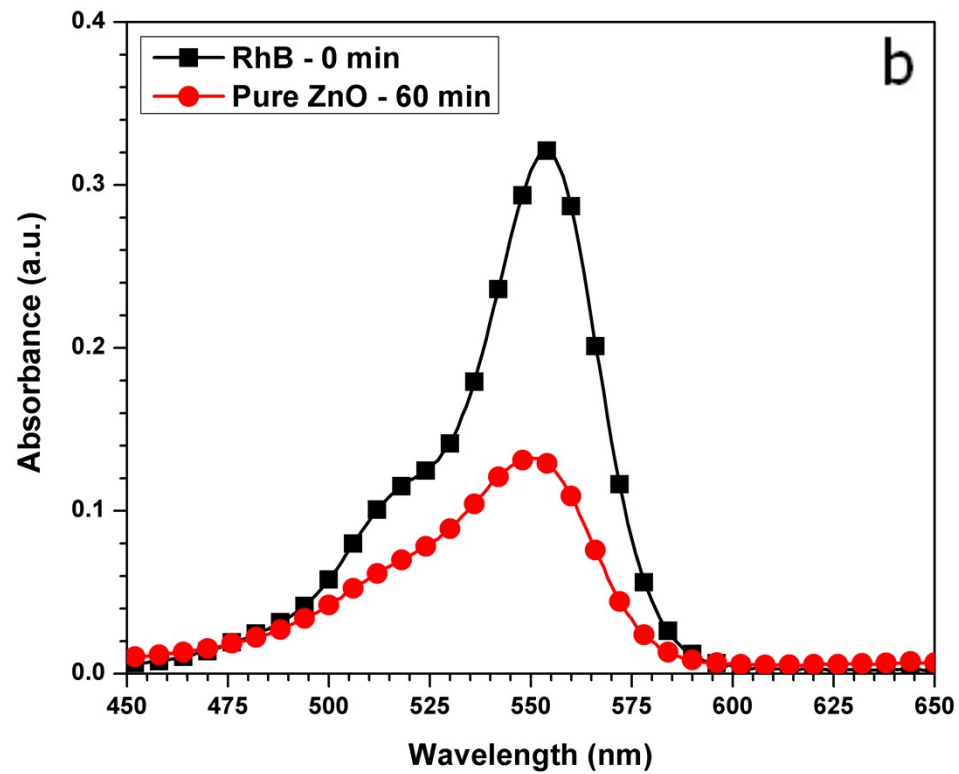

**Figure S6:** The absorbance spectra of RhB solution recorded at 0 min and after 60 min of UV light irradiation (a) Absence of catalyst, and (b) Presence of ZnO catalyst.
